# Supplementary material for: Temporal changes in metal concentrations in a polluted urban basin: the contribution of multivariate techniques to the evaluation of their recovery
Source: Research Square preprint supplement (doi:10.21203/rs.3.rs-1075467/v1), 2021-11-30

**Supplementary material**

Variation in values of metal concentration (mg/L) per site between 2008 and 2016 (As: Arsenic, Cd: cadmium, Cu: Cooper, Cr: chromium, Ni: Nickel, Pb: lead).
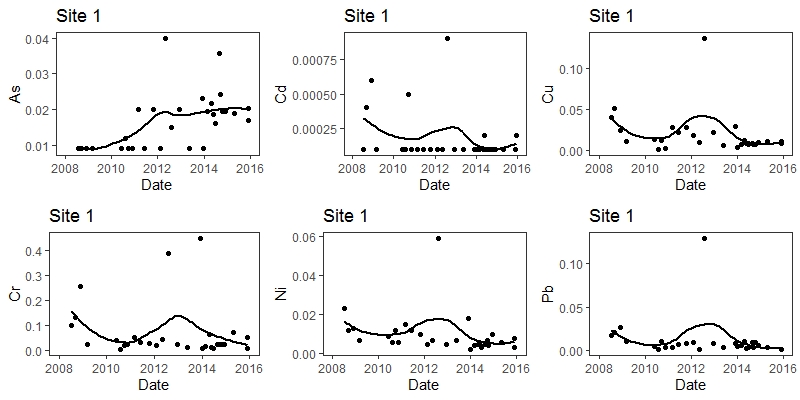

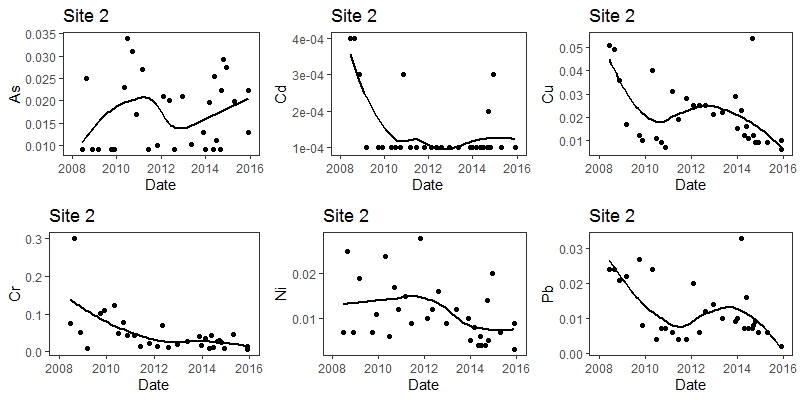

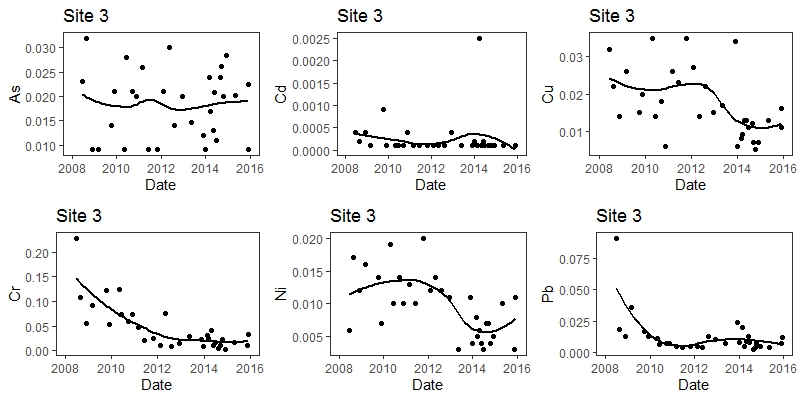


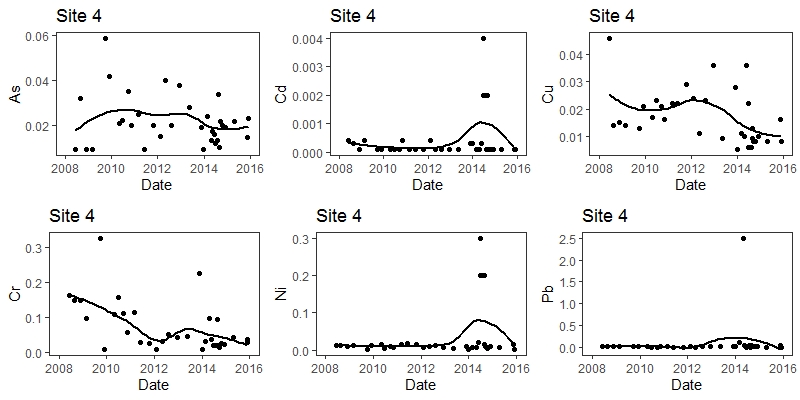

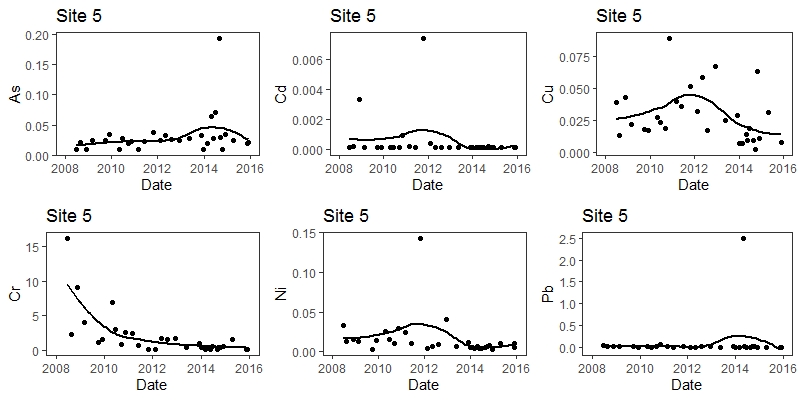

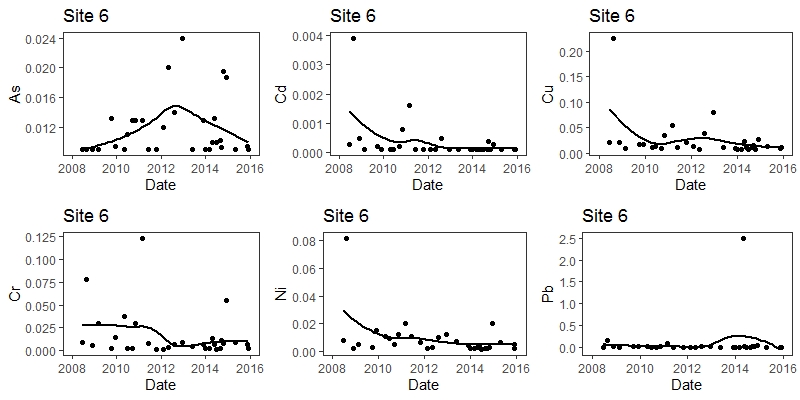

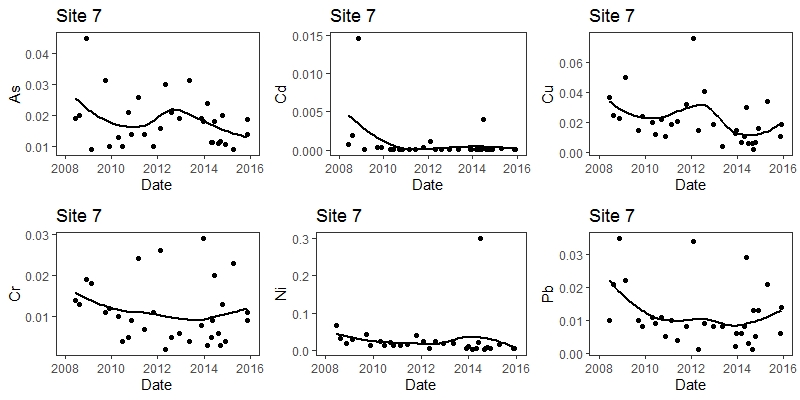

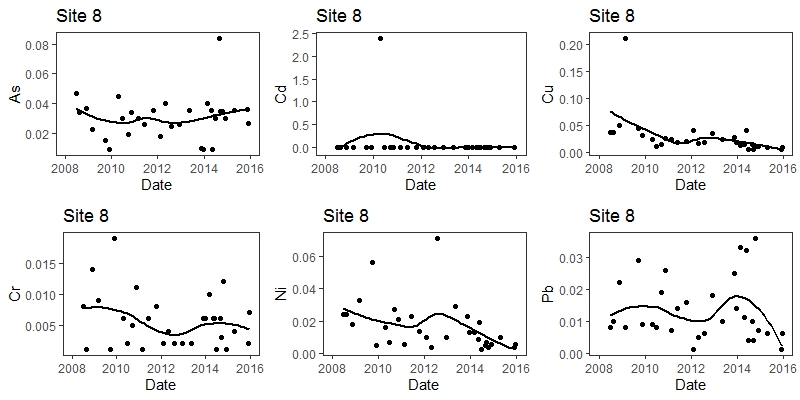

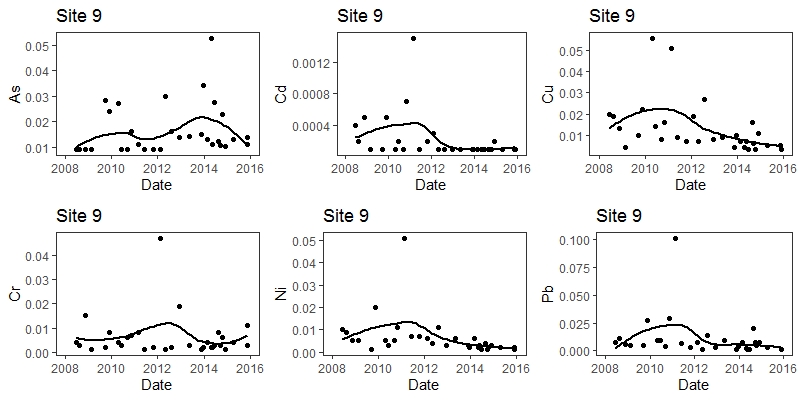

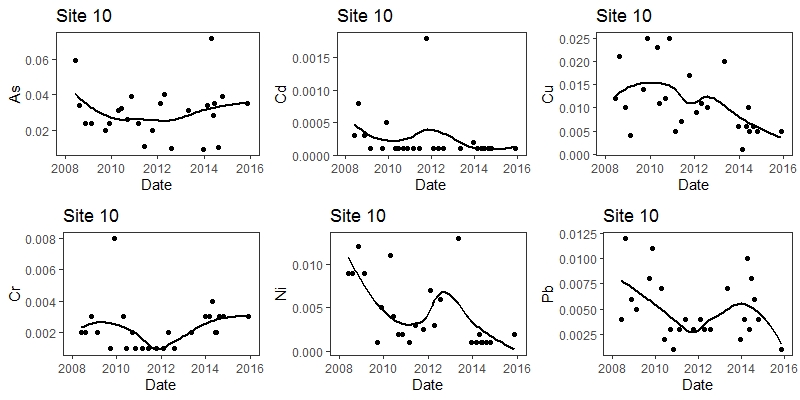

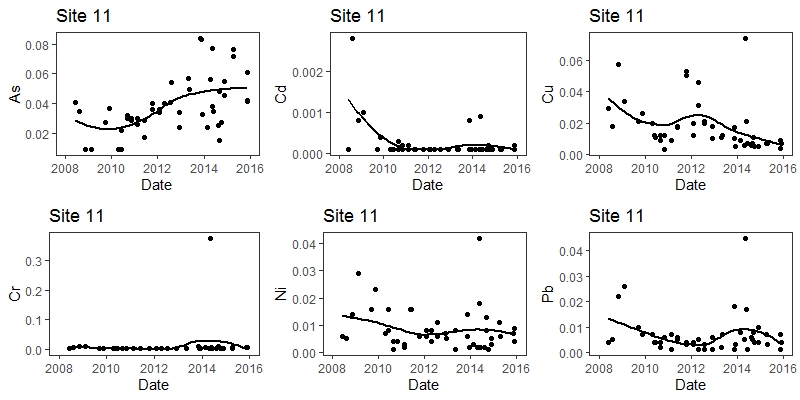

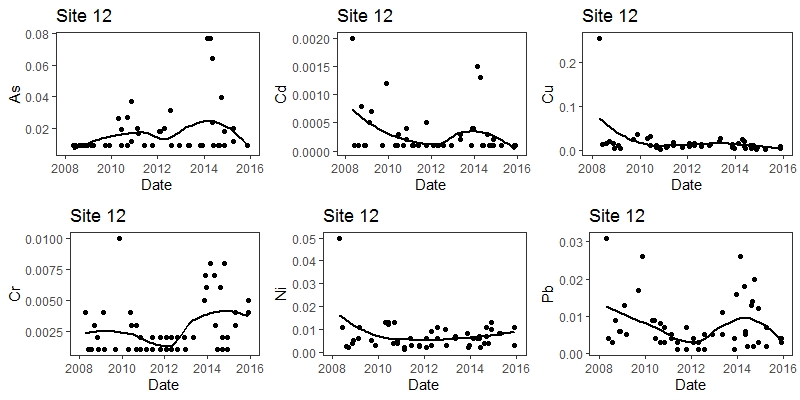

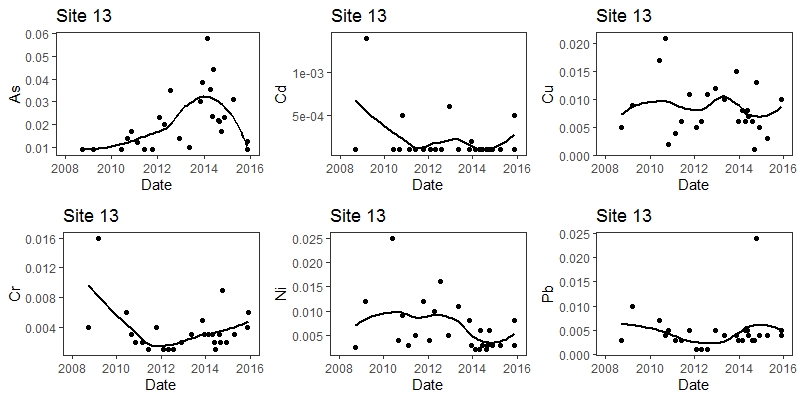

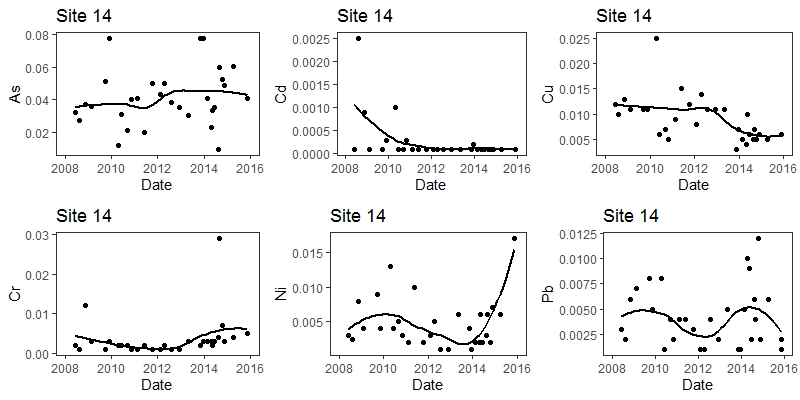

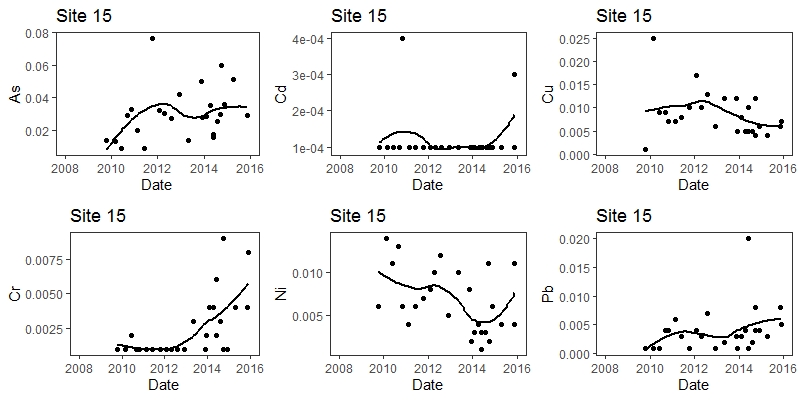

Supplement: Supplementary file 1 [file c2633081bcb6022cae4b63a3.docx]
